# Supplementary material for: Impact and Effectiveness of Group Strategies for Supporting Breastfeeding after Birth: A Systematic Review
Source: MDPI journal article supplement (doi:10.3390/ijerph18052550), 2021-03-04
Supplement: s1 [file s1]

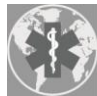

*Supplementary Material*

**Table S1.** PRISMA 2009 Checklist: Recommended items in a systematic review.

| Section and topic                  | Item No. | Checklist item                                                                                                                                                                                                                                                                                              | Reported on page |
|------------------------------------|----------|-------------------------------------------------------------------------------------------------------------------------------------------------------------------------------------------------------------------------------------------------------------------------------------------------------------|------------------|
| <b>TITLE</b>                       |          |                                                                                                                                                                                                                                                                                                             |                  |
| Title:                             | 1        | Identify the report as a systematic review, meta-analysis, or both.                                                                                                                                                                                                                                         | 1                |
| <b>ABSTRACT</b>                    |          |                                                                                                                                                                                                                                                                                                             |                  |
| Structured summary                 | 2        | Provide a structured summary including, as applicable: background; objectives; data sources; study eligibility criteria, participants, and interventions; study appraisal and synthesis methods; results; limitations; conclusions and implications of key findings; systematic review registration number. | 1                |
| <b>INTRODUCTION</b>                |          |                                                                                                                                                                                                                                                                                                             |                  |
| Rationale                          | 3        | Describe the rationale for the review in the context of what is already known                                                                                                                                                                                                                               | 1–2              |
| Objectives                         | 4        | Provide an explicit statement of questions being addressed with reference to participants, interventions, comparisons, outcomes, and study design (PICOS).                                                                                                                                                  | 2–3              |
| <b>METHODS</b>                     |          |                                                                                                                                                                                                                                                                                                             |                  |
| Protocol and registration          | 5        | Indicate if a review protocol exists, if and where it can be accessed (e.g., Web address), and, if available, provide registration information including registration number.                                                                                                                               | -                |
| Eligibility criteria               | 6        | Specify study characteristics (e.g., PICOS, length of follow-up) and report characteristics (e.g., years considered, language, publication status) used as criteria for eligibility, giving rationale.                                                                                                      | 2–3              |
| Information sources                | 7        | Describe all information sources (e.g., databases with dates of coverage, contact with study authors to identify additional studies) in the search and date last searched.                                                                                                                                  | 2–3              |
| Search                             | 8        | Present full electronic search strategy for at least one database, including any limits used, such that it could be repeated.                                                                                                                                                                               | 3                |
| Study selection                    | 9        | State the process for selecting studies (i.e., screening, eligibility, included in systematic review, and, if applicable, included in the meta-analysis).                                                                                                                                                   | 4–5              |
| Data collection process            | 10       | Describe method of data extraction from reports (e.g., piloted forms, independently, in duplicate) and any processes for obtaining and confirming data from investigators.                                                                                                                                  | 4–5              |
| Data items                         | 11       | List and define all variables for which data were sought (e.g., PICOS, funding sources) and any assumptions and simplifications made.                                                                                                                                                                       |                  |
| Risk of bias in individual studies | 12       | Specify any assessment of risk of bias that may affect the cumulative evidence (e.g., publication bias, selective reporting within studies).                                                                                                                                                                | 6–7              |
| Summary measures                   | 13       | State the principal summary measures (e.g., risk ratio, difference in means).                                                                                                                                                                                                                               | -                |
| Synthesis or results               | 14       | Describe the methods of handling data and combining results of studies, if done, including measures of consistency (e.g., $I^2$ ) for each meta-analysis.                                                                                                                                                   | -                |
| Risk of bias across studies        | 15       | Specify any assessment of risk of bias that may affect the cumulative evidence (e.g., publication bias, selective reporting within studies).                                                                                                                                                                | 6–7              |

|                               |    |                                                                                                                                                                                                          |                                    |
|-------------------------------|----|----------------------------------------------------------------------------------------------------------------------------------------------------------------------------------------------------------|------------------------------------|
| Additional analyses           | 16 | Describe methods of additional analyses (e.g., sensitivity or subgroup analyses, meta-regression), if done, indicating which were pre-specified.                                                         | -                                  |
| <b>RESULTS</b>                |    |                                                                                                                                                                                                          |                                    |
| Study selection               | 17 | Give numbers of studies screened, assessed for eligibility, and included in the review, with reasons for exclusions at each stage, ideally with a flow diagram.                                          | 4–5                                |
| Study characteristics         | 18 | For each study, present characteristics for which data were extracted (e.g., study size, PICOS, follow-up period) and provide the citations.                                                             | 7–13                               |
| Risk of bias within studies   | 19 | Present data on risk of bias of each study and, if available, any outcome level assessment (see item 12).                                                                                                | 6–7;7–12<br>Supplementary material |
| Results of individual studies | 20 | For all outcomes considered (benefits or harms), present, for each study: (a) simple summary data for each intervention group (b) effect estimates and confidence intervals, ideally with a forest plot. | 7–12                               |
| Synthesis of results          | 21 | Present results of each meta-analysis done, including confidence intervals and measures of consistency.                                                                                                  | -                                  |
| Risk of bias across studies   | 22 | Present results of any assessment of risk of bias across studies (see Item 15).                                                                                                                          | -                                  |
| Additional analysis           | 23 | Give results of additional analyses, if done (e.g., sensitivity or subgroup analyses, meta-regression [see Item 16]).                                                                                    | -                                  |
| <b>DISCUSSION</b>             |    |                                                                                                                                                                                                          |                                    |
| Summary of evidence           | 24 | Summarize the main findings including the strength of evidence for each main outcome; consider their relevance to key groups (e.g., healthcare providers, users, and policy makers).                     | 19                                 |
| Limitations                   | 25 | Discuss limitations at study and outcome level (e.g., risk of bias), and at review-level (e.g., incomplete retrieval of identified research, reporting bias).                                            | 20                                 |
| Conclusions                   | 26 | Provide a general interpretation of the results in the context of other evidence, and implications for future research.                                                                                  | 20                                 |
| <b>FUNDING</b>                |    |                                                                                                                                                                                                          |                                    |
| Funding                       | 27 | Describe sources of funding for the systematic review and other support (e.g., supply of data); role of funders for the systematic review.                                                               | 21                                 |

From: Moher, D.; Liberati, A.; Tetzlaff, J.; Altman, D.G. The PRISMA Group. Preferred Reporting Items for Systematic Reviews and Meta-Analyses: The PRISMA Statement. *PLoS Med.* **2009**, 6(7): e1000097. doi:10.1371/journal.pmed1000097.

**Table S2.** Methodological quality evaluation of observational studies—STROBE scale.

| Section/Topic             | Item No. | Rayfield et al. [36] | Undlien et al. [37] | Ruducha et al. [38] | Robinson et al. [39] | Jenkins et al. [40] |
|---------------------------|----------|----------------------|---------------------|---------------------|----------------------|---------------------|
| <b>Title and abstract</b> | 1a       | ✓                    | x                   | x                   | ✓                    | ✓                   |
|                           | 1b       | ✓                    | ✓                   | ✓                   | ✓                    | ✓                   |
| <b>Introduction</b>       |          |                      |                     |                     |                      |                     |
| Background/Rationale      | 2        | ✓                    | ✓                   | ✓                   | ✓                    | ✓                   |
| Objectives                | 3        | ✓                    | ✓                   | ✓                   | ✓                    | ✓                   |
| <b>Methods</b>            |          |                      |                     |                     |                      |                     |
| Study design              | 4        | ✓                    | ✓                   | ✓                   | ✓                    | x                   |
| Setting                   | 5        | ✓                    | ✓                   | ✓                   | ✓                    | ✓                   |
| Participants              | 6        | -                    | ✓                   | ✓                   | ✓                    | ✓                   |
|                           | 6b       | ✓                    | -                   | -                   | -                    | -                   |
| Variables                 | 7        | ✓                    | x                   | x                   | ✓                    | x                   |
| Data sources/Measurement  | 8        | ✓                    | ✓                   | ✓                   | ✓                    | x                   |
| Bias                      | 9        | x                    | x                   | x                   | x                    | x                   |
| Study size                | 10       | x                    | x                   | x                   | x                    | x                   |
| Quantitative variables    | 11       | ✓                    | ✓                   | ✓                   | ✓                    | x                   |
|                           | 12a      | ✓                    | x                   | ✓                   | ✓                    | x                   |
|                           | 12b      | ✓                    | ✓                   | ✓                   | ✓                    | x                   |
|                           | 12c      | x                    | x                   | x                   | x                    | x                   |
|                           | 12d      | x                    | x                   | x                   | x                    | x                   |
| Statistical methods       | 12e      | ✓                    | ✓                   | ✓                   | x                    | x                   |
|                           |          |                      |                     |                     |                      |                     |
|                           |          |                      |                     |                     |                      |                     |
|                           |          |                      |                     |                     |                      |                     |
|                           |          |                      |                     |                     |                      |                     |
| <b>Results</b>            |          |                      |                     |                     |                      |                     |
| Participants              | 13a      | ✓                    | ✓                   | x                   | ✓                    | ✓                   |
|                           | 13b      | -                    | ✓                   | x                   | x                    | x                   |
|                           | 13c      | x                    | x                   | x                   | x                    | x                   |
|                           | 14a      | ✓                    | ✓                   | ✓                   | ✓                    | ✓                   |
| Descriptive data          | 14b      | x                    | x                   | x                   | x                    | x                   |
|                           | 14c      | -                    | -                   | -                   | -                    | -                   |
| Outcome data              | 15       | ✓                    | ✓                   | ✓                   | ✓                    | ✓                   |
|                           | 16a      | ✓                    | ✓                   | ✓                   | ✓                    | ✓                   |
| Main Results              | 16b      | ✓                    | x                   | ✓                   | ✓                    | ✓                   |
|                           | 16c      | ✓                    | -                   | ✓                   | -                    | -                   |
| Other analyses            | 17       | ✓                    | ✓                   | ✓                   | ✓                    | ✓                   |
| <b>Discussion</b>         |          |                      |                     |                     |                      |                     |
| Key results               | 18       | ✓                    | ✓                   | ✓                   | ✓                    | ✓                   |
| Limitations               | 19       | ✓                    | ✓                   | ✓                   | ✓                    | ✓                   |
| Interpretation            | 20       | ✓                    | ✓                   | ✓                   | ✓                    | ✓                   |

|                          |    |   |   |   |   |   |
|--------------------------|----|---|---|---|---|---|
| Generalizability         | 21 | ✓ | ✓ | ✓ | ✓ | ✓ |
| <b>Other information</b> |    |   |   |   |   |   |
| Funding                  | 25 | ✓ | x | ✓ | ✓ | ✓ |

X: Unidentified item

✓: Identified item

-: Not applicable

From: von Elm, E.; Altman, D.G.; Egger, M.; Pocock, S.J.; Gøtzsche, P.C.; Vandenbroucke, J.P..STROBE Initiative. The Strengthening the Reporting of Observational Studies in Epidemiology (STROBE) statement: guidelines for reporting observational studies. PLoS Med. **2007**,16:e296. doi: 10.1371/journal.pmed.0040296.

**Table S3.** Evaluation of the methodological quality of experimental studies—CONSORT 2010 checklist.

| Section/Topic                                        | Item No. | Moudy et al. [28] | Niela-Vilén et al. [29] | Scott et al. [33] | Schreck et al. [34] | Saggurti et al. [30] | Lee et al. [35] | Hazra et al. [32] | M'Liria et al. [31] |
|------------------------------------------------------|----------|-------------------|-------------------------|-------------------|---------------------|----------------------|-----------------|-------------------|---------------------|
| Title and abstract                                   | 1a       | -                 | ✓                       | -                 | -                   | -                    | -               | -                 | ✓                   |
|                                                      | 1b       | ✓                 | ✓                       | ✓                 | ✓                   | ✓                    | ✓               | ✓                 | ✓                   |
| Background and objectives                            | 2a       | ✓                 | ✓                       | ✓                 | ✓                   | ✓                    | ✓               | ✓                 | ✓                   |
|                                                      | 2b       | ✓                 | ✓                       | ✓                 | ✓                   | ✓                    | ✓               | ✓                 | ✓                   |
| Trial design                                         | 3a       | ✓                 | ✓                       | x                 | ✓                   | ✓                    | ✓               | ✓                 | ✓                   |
|                                                      | 3b       | x                 | x                       | x                 | x                   | x                    | x               | x                 | x                   |
| Participants                                         | 4a       | ✓                 | ✓                       | ✓                 | ✓                   | ✓                    | ✓               | ✓                 | ✓                   |
|                                                      | 4b       | ✓                 | ✓                       | ✓                 | ✓                   | ✓                    | ✓               | ✓                 | ✓                   |
| Interventions                                        | 5        | ✓                 | ✓                       | ✓                 | ✓                   | ✓                    | ✓               | ✓                 | ✓                   |
| Outcomes                                             | 6a       | ✓                 | ✓                       | ✓                 | ✓                   | ✓                    | ✓               | ✓                 | ✓                   |
|                                                      | 6b       | x                 | x                       | x                 | x                   | x                    | x               | x                 | x                   |
| Sample size                                          | 7a       | ✓                 | ✓                       | x                 | x                   | ✓                    | ✓               | ✓                 | ✓                   |
|                                                      | 7b       | ✓                 | ✓                       | x                 | x                   | x                    | x               | x                 | x                   |
| Sequence generation                                  | 8a       | ✓                 | ✓                       | -                 | -                   | ✓                    | -               | -                 | ✓                   |
|                                                      | 8b       | ✓                 | ✓                       | -                 | -                   | ✓                    | -               | -                 | ✓                   |
| Allocation concealment mechanism                     | 9        | x                 | x                       | -                 | -                   | x                    | -               | -                 | ✓                   |
| Implementation                                       | 10       | ✓                 | x                       | -                 | x                   | ✓                    | x               | x                 | ✓                   |
| Blinding                                             | 11a      | x                 | x                       | x                 | x                   | x                    | x               | x                 | ✓                   |
|                                                      | 11b      | -                 | -                       | -                 | -                   | -                    | -               | -                 | ✓                   |
| Statistical methods                                  | 12a      | ✓                 | ✓                       | ✓                 | ✓                   | ✓                    | ✓               | ✓                 | ✓                   |
|                                                      | 12b      | ✓                 | x                       | x                 | x                   | x                    | ✓               | ✓                 | ✓                   |
| Participant flow (a diagram is strongly recommended) | 13a      | ✓                 | ✓                       | -                 | x                   | x                    | ✓               | x                 | ✓                   |
|                                                      | 13b      | ✓                 | ✓                       | -                 | x                   | x                    | ✓               | x                 | ✓                   |
| Recruitment                                          | 14a      | ✓                 | ✓                       | ✓                 | ✓                   | ✓                    | ✓               | ✓                 | ✓                   |
|                                                      | 14b      | ✓                 | ✓                       | ✓                 | ✓                   | ✓                    | ✓               | ✓                 | ✓                   |

|                         |     |   |   |   |   |   |   |   |   |
|-------------------------|-----|---|---|---|---|---|---|---|---|
| Baseline data           | 15  | ✓ | ✓ | x | ✓ | ✓ | ✓ | ✓ | ✓ |
| Numbers analysed        | 16  | ✓ | ✓ | ✓ | ✓ | ✓ | ✓ | ✓ | ✓ |
| Outcomes and estimation | 17a | ✓ | ✓ | ✓ | ✓ | ✓ | ✓ | ✓ | ✓ |
|                         | 17b | ✓ | ✓ | ✓ | ✓ | ✓ | ✓ | ✓ | ✓ |
| Ancillary analyses      | 18  | ✓ | ✓ | ✓ | ✓ | ✓ | ✓ | ✓ | ✓ |
| Harms                   | 19  | x | x | x | x | x | x | x | x |
| Limitations             | 20  | x | ✓ | ✓ | ✓ | ✓ | ✓ | ✓ | ✓ |
| Generalisability        | 21  | ✓ | ✓ | ✓ | ✓ | ✓ | ✓ | ✓ | ✓ |
| Interpretation          | 22  | ✓ | ✓ | ✓ | ✓ | ✓ | ✓ | ✓ | ✓ |
| Registration            | 23  | x | ✓ | - | x | x | x | x | x |
| Protocol                | 24  | x | x | x | x | x | x | x | x |
| Funding                 | 25  | x | ✓ | ✓ | ✓ | x | ✓ | ✓ | ✓ |

X: Unidentified item

✓: Identified item

-: Not applicable

From: Schulz, K.F.; Altman, D.G.; Moher, D.; for the CONSORT Group. CONSORT 2010 Statement: updated guidelines for reporting parallel group randomized trials. *BMJ*. **2010**, 23:c332. doi: 10.1136/bmj.c332
